# Supplementary material for: [NH3(CH2)6NH3]PbI4 as Dion–Jacobson phase bifunctional capping layer for 2D/3D perovskite solar cells with high efficiency and excellent UV stability
Source: Royal Society of Chemistry journal article supplement (doi:10.1039/d0ta02437f), 2020-01-01
Supplement: d0ta02437f1.pdf [file d0ta02437f1.pdf]

# Supplementary information

## for

### **[NH<sub>3</sub>(CH<sub>2</sub>)<sub>6</sub>NH<sub>3</sub>]PbI<sub>4</sub> as Dion-Jacobson Phase Bifunctional Capping Layer for 2D/3D Perovskite Solar Cells with High Efficiency and Excellent UV Stability**

Yanping Lv<sup>ab</sup>, Hongru Ma<sup>a</sup>, Yanfeng Yin<sup>c</sup>, Qingshun Dong<sup>a</sup>, Weidong Zhao<sup>a</sup>, Shengye Jin<sup>c</sup> and Yantao Shi<sup>\*a</sup>

#### **Experimental Details**

**Materials and reagents:** PbBr<sub>2</sub> (99.999%) was purchased from TCI Chemicals. SnCl<sub>2</sub>·2H<sub>2</sub>O (dihydrate, ACS, 98%) and PbI<sub>2</sub> (99.9985%) were purchased from Alfa Aesar. HC(NH<sub>2</sub>)<sub>2</sub>I (FAI), CH<sub>3</sub>NH<sub>3</sub>Br, 1,6-diaminohexane ammonium iodide (HDADI) were purchased from Xi'an Polymer Light Technology Corp. N, N-dimethylformamide (DMF, anhydrous, 99.8%), dimethyl sulfoxide (DMSO, anhydrous, 99.9%), 2-propanol (99.5%), chlorobenzene (99.8%), CsI (99.999%), acetonitrile and 4-tert-butylpyridine (TBP, 96%) were purchased from Sigma-Aldrich. Spiro-MeOTAD was purchased from Borun New Material Technology Co., Ltd. Lithium bis-(trifluoromethylsulphonyl) imide (99.95%), and FK 209 Co (III) TFSI salt were purchased from Dyesol.

**Preparation of [NH<sub>3</sub>(CH<sub>2</sub>)<sub>6</sub>NH<sub>3</sub>]PbI<sub>4</sub> (2D, n=1) film:** 186 mg HDADI and 230.5 mg PbI<sub>2</sub> were added in 1 mL DMF (Sigma-Aldrich), followed by stirring for 3 hr at 60 °C. After cooling and filtered, it was spin-coated on top of FTO substrate at 2000 rpm for 60 s.

**UV testing method:** The prepared perovskite films were placed under the UV lamp with a light intensity of 6.9 mW cm<sup>-2</sup> for irradiation for a certain time.

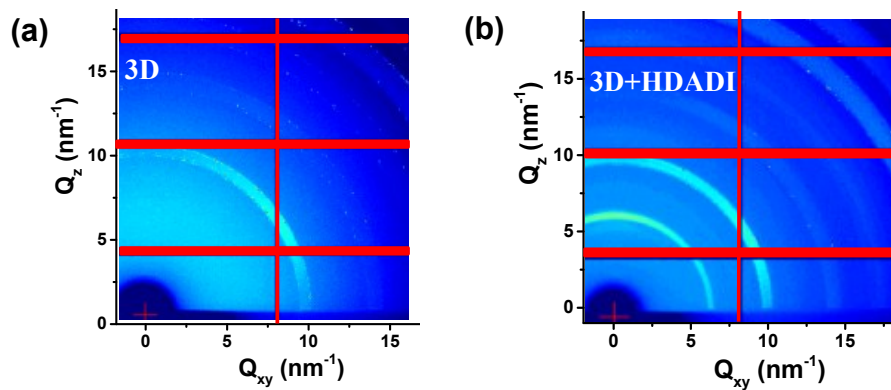

**Figure S1.** Grazing incidence wide-angle X-ray scattering images of 3D (a) and 3D+HDADI (b) film samples.

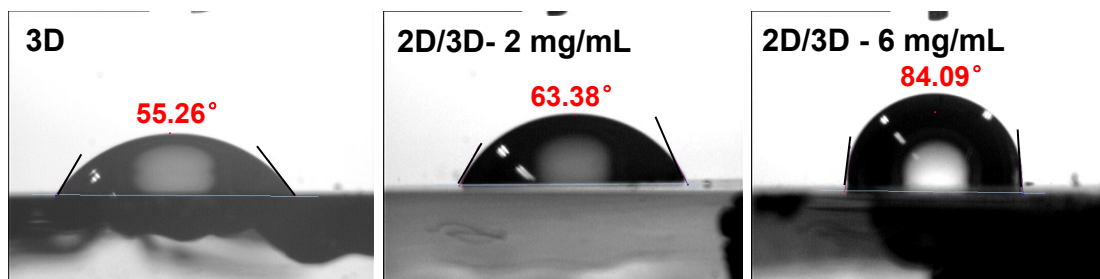

**Figure S2.** Water contact-angle test of 3D and 2D/3D based perovskite films, where 2 mg/mL and 6 mg/mL represent the concentrations of the HDADI isopropanol solution.

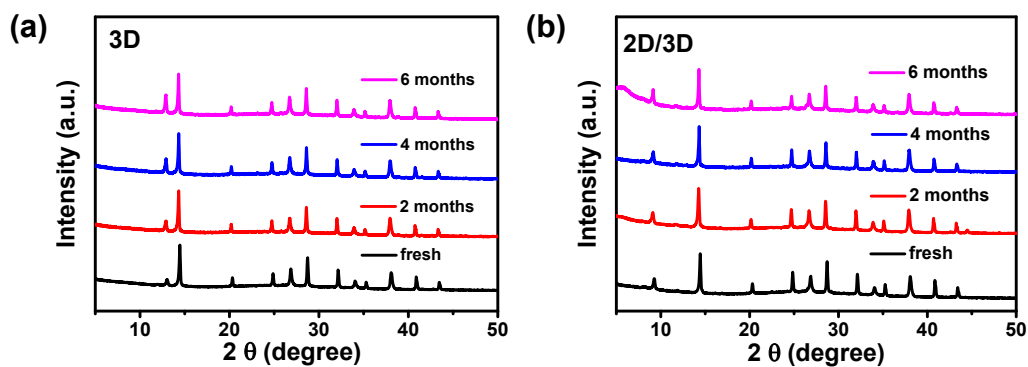

**Figure S3.** XRD patterns of (a) 3D, (b) 2D/3D. The sample was stored in  $\approx 60\%$  RH humidity at ambient atmosphere in the dark condition without encapsulation.

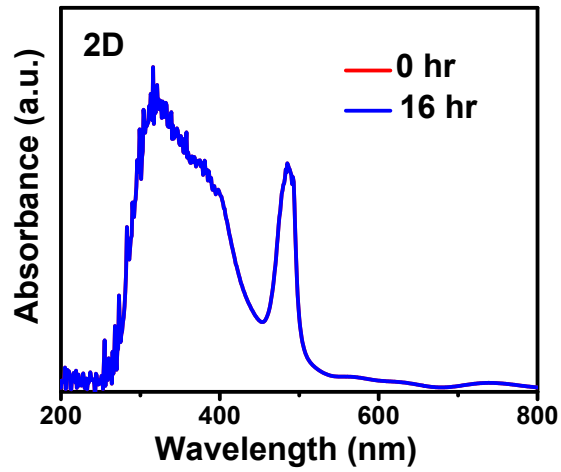

**Figure S4.** UV-vis absorption spectra of 2D perovskite films before and after exposing to the UV radiation for 16 hours.

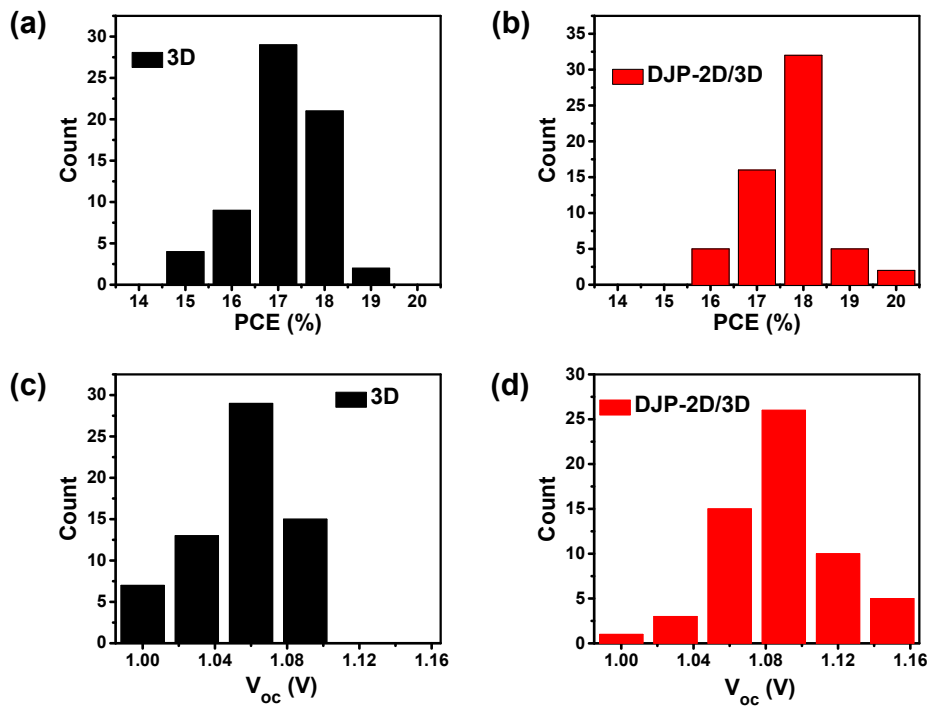

**Figure S5.** (a-b) Histogram of the number of cells as a function of PCE distributions under reverse scan direction of (a) 3D and (b) DJP-2D/3D based PSCs. (c-d) Histogram of the number of cells as a function of open-circuit voltage ( $V_{oc}$ ) distributions under reverse scan direction of (c) 3D and (d) DJP-2D/3D based PSCs.

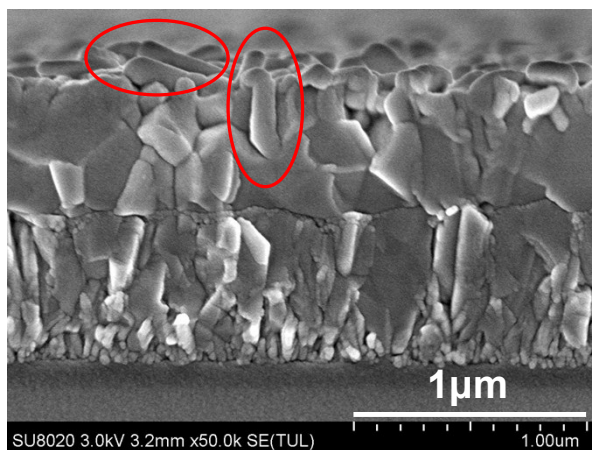

**Figure S6.** Cross-section SEM images of the DJP-2D/3D perovskite film deposited on FTO/SnO<sub>2</sub> substrate.

**Table S1.** Biexponential fitting decay profiles of 3D and DJP-2D/3D based Glass/Perovskite configurations.

| Sample    | $\tau_1$ (ns) | $A_1$ | $\tau_2$ (ns) | $A_2$ | $\tau_{avg}$ (ns) |
|-----------|---------------|-------|---------------|-------|-------------------|
| 3D        | 3.9           | 0.88  | 57.6          | 0.12  | 40                |
| DJP-2D/3D | 5.9           | 0.78  | 60.0          | 0.22  | 46                |

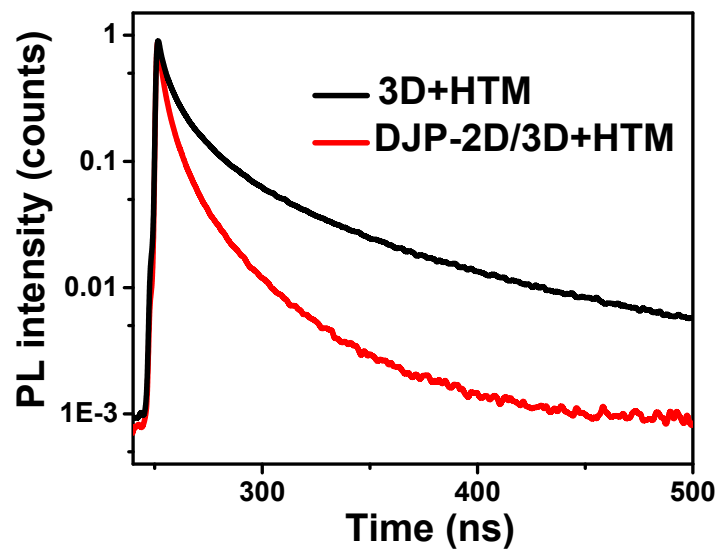

**Figure S7.** The time-resolved PL decay curves of the glass / Perovskite / HTM samples.
